# Supplementary material for: Transcriptome-wide transmission disequilibrium analysis identifies novel risk genes for autism spectrum disorder
Source: PLoS Genet. 2021 Feb 4;17(2):e1009309. doi: 10.1371/journal.pgen.1009309 (PMC7888619; doi:10.1371/journal.pgen.1009309)
Supplement: S2 Table — Beta and SE indicate the effect size estimates with respect to A1 counts and standard error in GWAS. (XLSX) [file pgen.1009309.s025.xlsx]

## Sheet: S2 Table
S2 Table. Genome-wide significant loci in GWAS meta-analysis. Beta and SE indicate the effect size estimates with respect to A1 counts and standard error in GWAS.
					Discovery Stage (N=7,805 trios)												Replication Stage (N=35,740)			Meta Analysis
CHR	BP	Index Variant	A1	A2	Beta.AGP	SE.AGP	P.AGP	Beta.SSC	SE.SSC	P.SSC	Beta.SPARK	SE.SPARK	P.SPARK	Beta.meta	SE.meta	P.meta	Beta	SE	P	Beta	SE	P
1	96569557	rs716219	T	C	0.078124	0.0456665	0.0871268	0.0977	0.0499	0.05048	0.0864956	0.0344434	0.0120309	0.0868	0.0241	0.0003157	0.075803	0.0169	7.615e-06	0.0794	0.0138	9.451e-09
8	10573702	rs7820334	T	C	0.169957	0.0468663	0.000287379	0.1087	0.0506	0.03192	0.0350396	0.035222	0.319824	0.0896	0.0246	0.0002708	0.0729995	0.0173	2.475e-05	0.0785	0.0142	2.91e-08
8	48036474	rs183563276	A	G	-	-	-	-	-	-	-	-	-	-	-	-	-0.485597	0.0879	3.362e-08	-0.4856	0.0879	3.306e-08
20	21122212	rs6047270	T	C	0.0835381	0.0463088	0.0712412	0.1009	0.05	0.04342	0.0649322	0.0347688	0.0618259	0.0786	0.0243	0.001223	0.0931989	0.0173	7.362e-08	0.0883	0.0141	3.738e-10
